# Supplementary material for: Oocyte-derived E-cadherin acts as a multiple functional factor maintaining the primordial follicle pool in mice
Source: PubMed Central journal article supplement (PMC6377673; doi:10.1038/s41419-018-1208-3), 2019-02-15

Figure S1

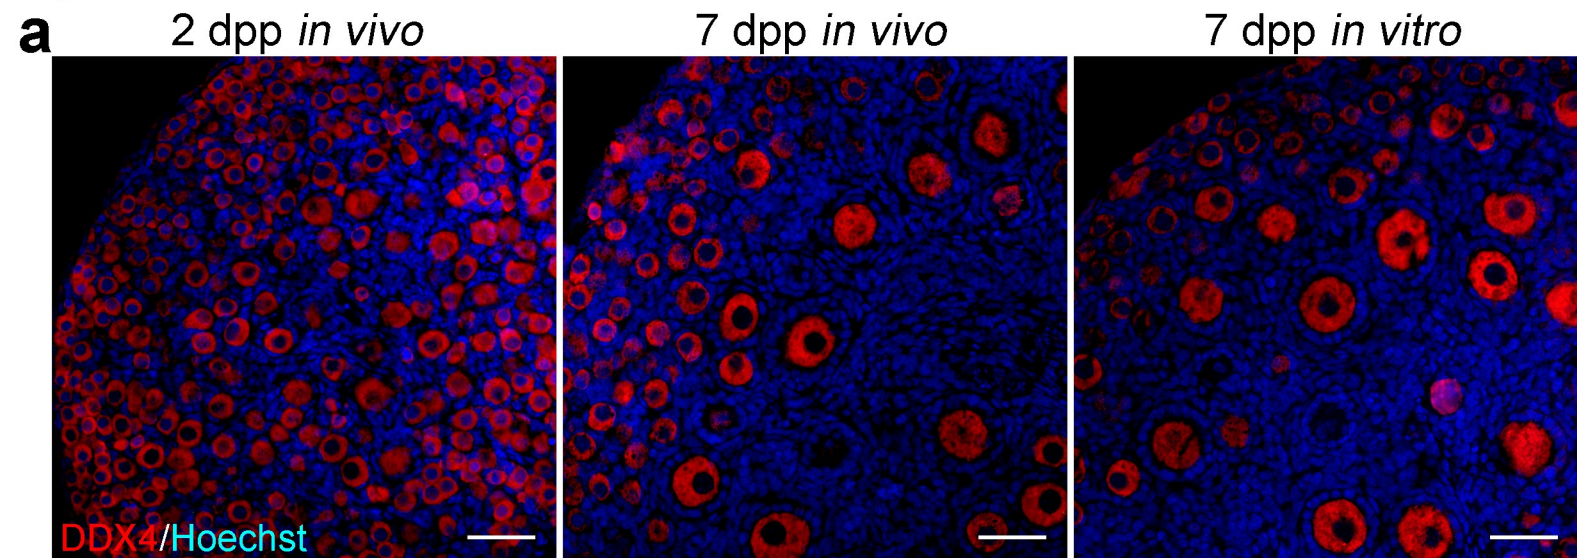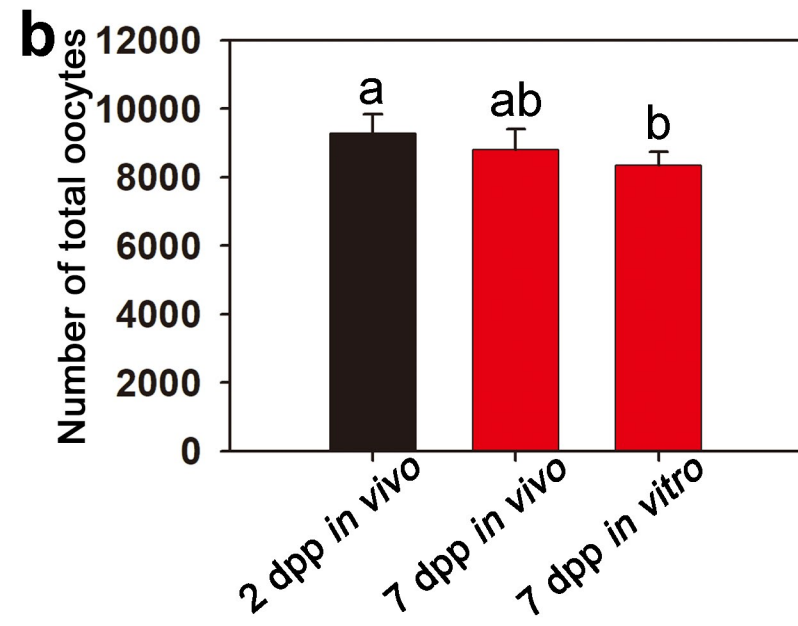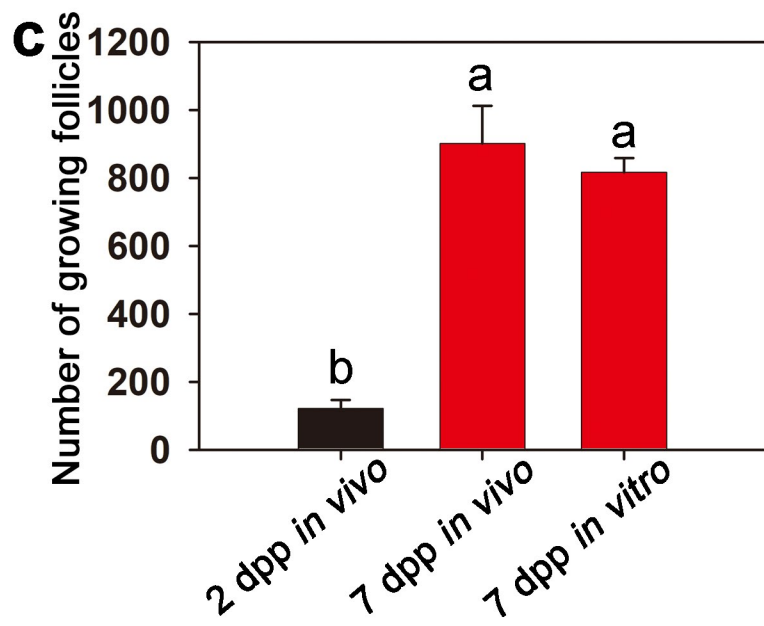

Supplement: 41419_2018_1208_MOESM1_ESM.pdf [file 41419_2018_1208_MOESM1_ESM.pdf]
